# Supplementary material for: Biomarkers of Myocardial Fibrosis: Revealing the Natural History of Fibrogenesis in Fabry Disease Cardiomyopathy
Source: PubMed Central journal article supplement — J Am Heart Assoc. 2018 Mar 13;7(6):e007124. doi: 10.1161/JAHA.117.007124 (PMC5907540; doi:10.1161/jaha.117.007124), 2018-03-13
Supplement: JAH3-7-e007124-s001.pdf [file JAH3-7-e007124-s001.pdf]

# Supplemental Material

## **Data S1.**

### **Supplemental Methods**

#### **Laboratorial methods**

Plasma lyso-Gb3 was quantified by liquid chromatography tandem-mass spectrometry (Agilent, ultra performance liquid chromatography [UPLC] triple quadrupole [QqQ] electrospray ionization [ESI]). The quantification was achieved by multiple reaction monitoring (MRM) of the transitions mass-to-charge ratios ( $m/z$ ) 786,4 $\rightarrow$ 282,3 and, as internal standard 1- $\beta$ -D-glucosylsphingosine (GSG), 460,5 $\rightarrow$ 280,3. The result was extrapolated from the calibration curve obtained from responses of calibrators of known concentrations versus internal standard.

PICP was measured in serum, by an ELISA method (QUIDEL Corporation<sup>®</sup>, Hannover, Germany; category number 8003), according to manufacturer instructions. The microelisa strip plate is pre-coated with human PICP monoclonal antibody and the kit uses p-nitrophenyl phosphate substrate to measure the immune complex obtained during the reaction; final colorimetric reaction is measured by photometry at 405 nm.

ICTP was measured in serum, by an ECLIA method (Roche<sup>®</sup> Diagnostics GmbH, Mannheim; Germany; reference 11972308122) in an automated analyser COBAS e411 instrument, according to manufacturer instructions. The detection of the marker in the samples is made using human ICTP monoclonal antibody.

MMP-1 was measured also in serum, in an assay using a double-antibody sandwich ELISA (SunRed<sup>®</sup> Biotechnology Company; category number 201-12-0917), according to the instructions of the manufacturer. The microelisa strip plate is pre-coated with human MMP-1 monoclonal antibody and the kit uses biotin-streptavidin-HRP technology for measure de immune complex obtained during the reaction; final colorimetric reaction is measured by photometry at 450 nm.

MMP-2 was measured in serum, also by a double-antibody sandwich ELISA assay (SunRed<sup>®</sup> Biotechnology Company; category number 201-12-0905), according to the instructions of the manufacturer. The microelisa strip plate is pre-coated with human MMP-2 monoclonal antibody and the kit uses biotin-streptavidin-HRP technology for measure de immune complex obtained during the reaction; final colorimetric reaction is measured by photometry at 450 nm.

B-AP was measured in serum, by ELISA methodology (QUIDEL Corporation<sup>®</sup>, Hannover, Germany; category number 8012), according to the instructions of the manufacturer. The microelisa strip plate is pre-coated with human B-AP monoclonal antibody and thee kit uses p-nitrophenyl

phosphate substrate to measure the immune complex obtained during the reaction; final colorimetric reaction is measured by photometry at 405 nm.

TRAP-5b was measured in serum, by an ELISA assay (ids, Immunodiagnostic Systems®, United Kingdom; category number SB-TR201A), according to the manufacturer instructions. The microelisa strip plate is pre-coated with human TRAP5b monoclonal antibody and the kit uses p-nitrophenyl phosphate substrate to measure the immune complex obtained during the reaction; final colorimetric reaction is measured by photometry at 405 nm.

**Table S1. Mutation frequency.**

| Mutation     | n  | %    |
|--------------|----|------|
| p.N215S      | 10 | 16.7 |
| p.F113L      | 9  | 15.0 |
| p.G35E       | 7  | 11.7 |
| c.700_702del | 2  | 3.3  |
| p.R227X      | 2  | 3.3  |
| p.C52G       | 2  | 3.3  |
| p.L166P      | 2  | 3.3  |
| p.N42V       | 2  | 3.3  |
| p.R342Q      | 2  | 3.3  |
| unknown      | 2  | 3.3  |
| other*       | 20 | 33.3 |

\* Mutations presented by only one patient within the study

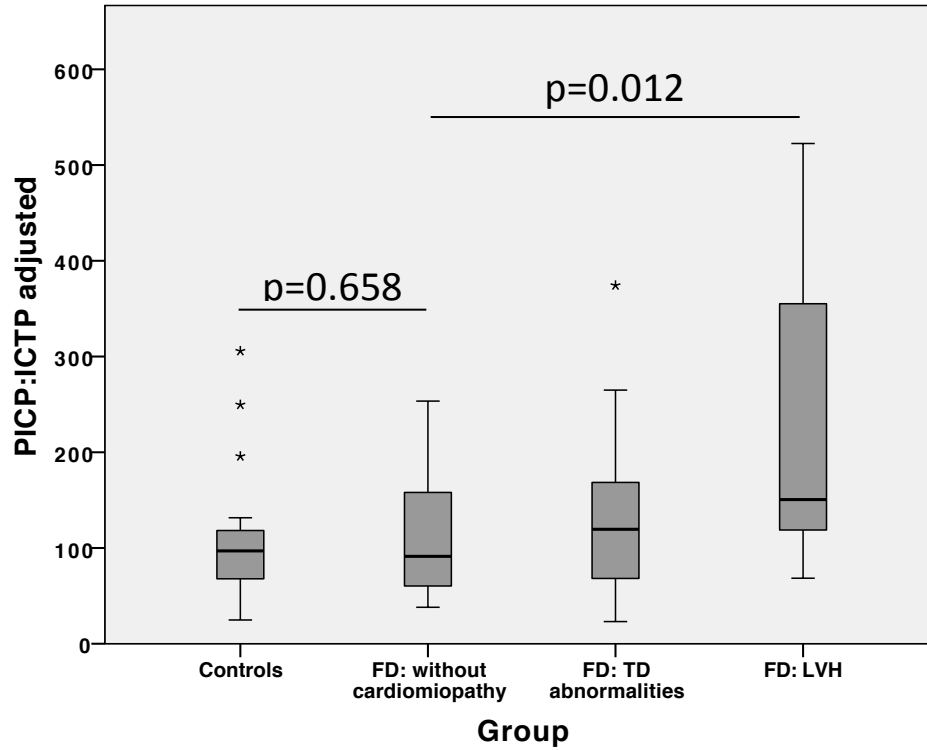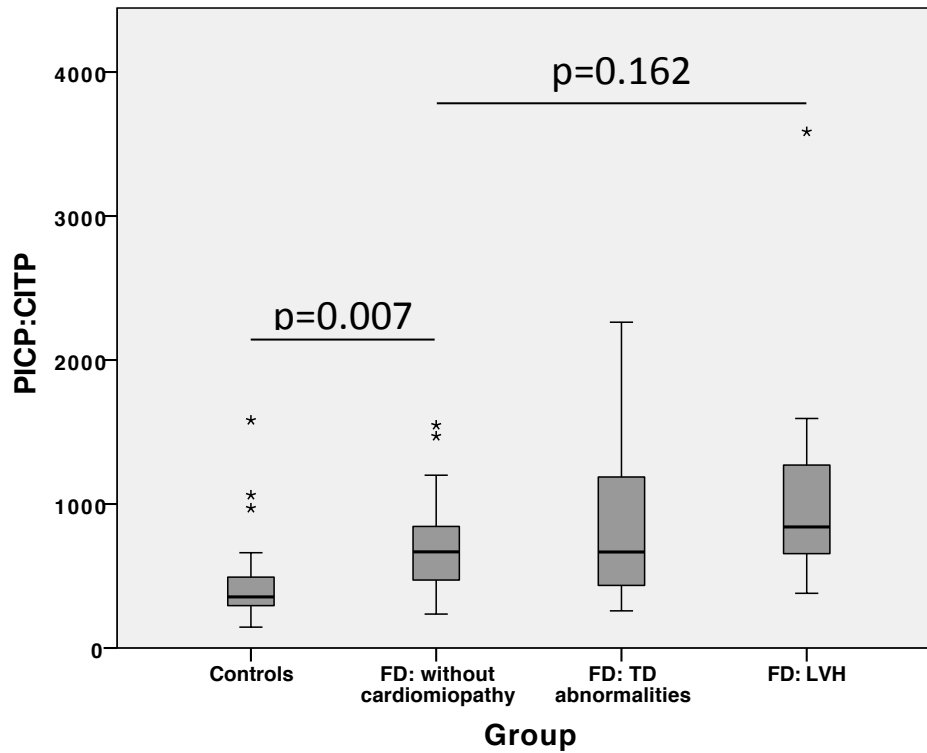

**Figure S1. Boxplot of PICP to ICTP ratio (before and after adjustment for bone collagen turnover) in controls and FD subgroups.**

PICP: carboxy-terminal propeptide of procollagen type I; ICTP: carboxy-terminal telopeptide of type I collagen.

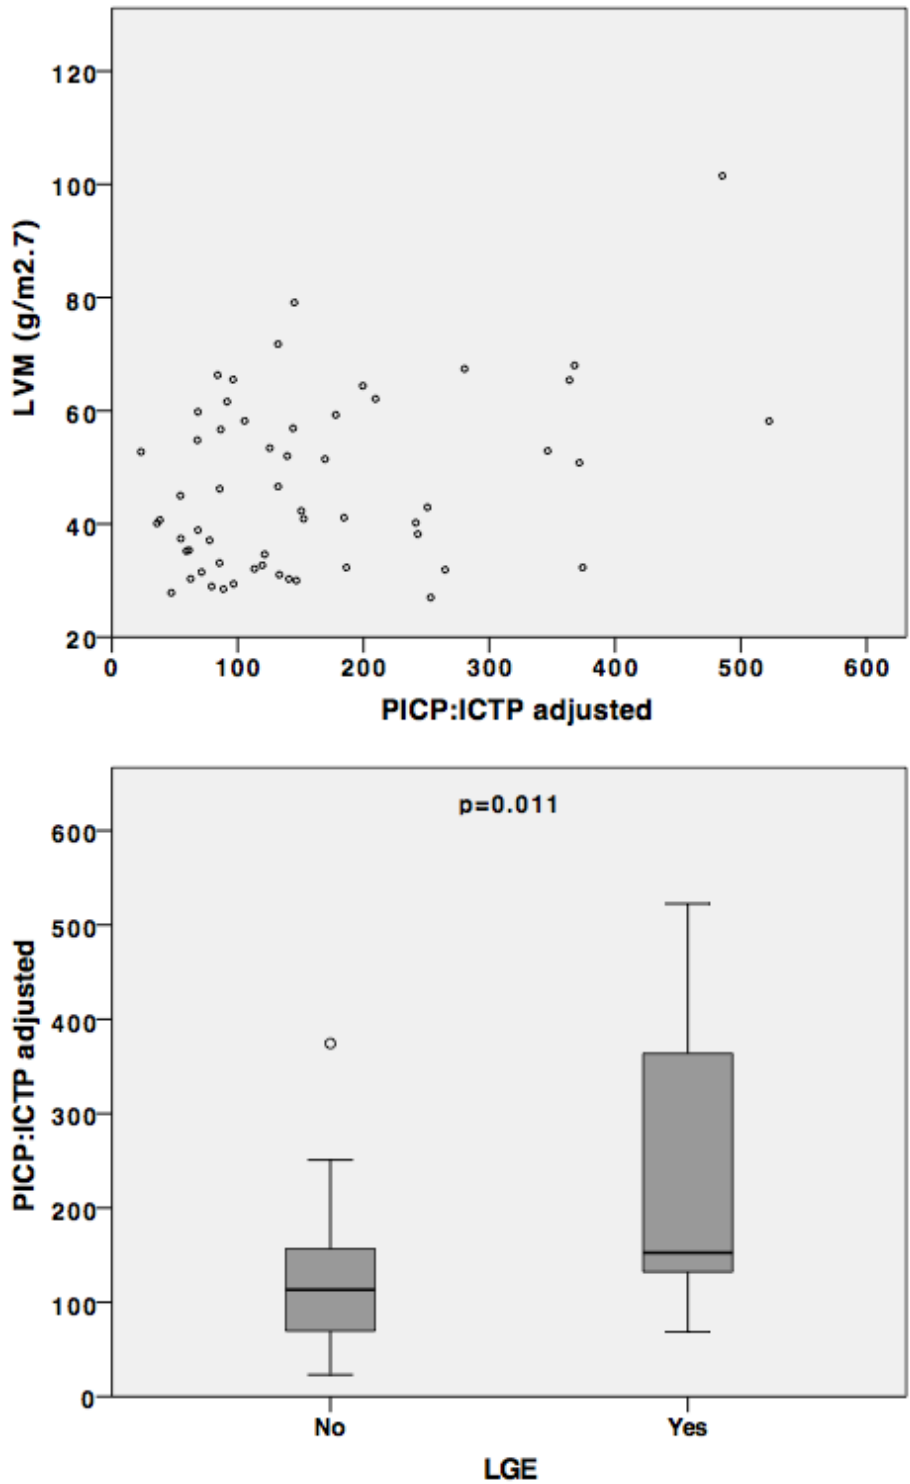

**Figure S2. Correlation between PICP to ICTP ratio (after adjustment for bone collagen turnover) and left ventricular mass (upper image); boxplot of PICP to ICTP ratio (after adjustment for bone collagen turnover) in LGE negative and positive patients (lower image).**

PICP: carboxy-terminal propeptide of procollagen type I; ICTP: carboxy-terminal telopeptide of type I collagen; LVM: left ventricular mass; LGE: late gadolinium enhancement.
